# Supplementary material for: Pharmacological rescue of impaired mitophagy in Parkinson’s disease-related LRRK2 G2019S knock-in mice
Source: eLife journal article supplement (doi:10.7554/elife.67604), 2021-08-02

GSK2578215A

pS935 LRRK2

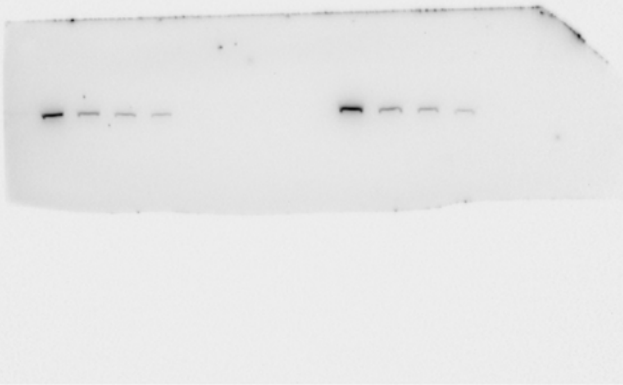

LRRK2

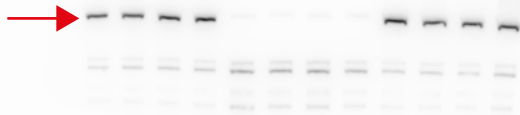

MLi-2

12/17 UDD2 MCF5 DOSE Response 5min

pS935 LRRK2

WTa WTb KO G2019S

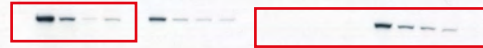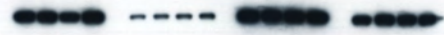

12/17 UDD3 30s MCF5 Dose-Response

pS935 LRRK2

WTa WTb KO G2019S

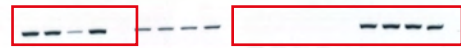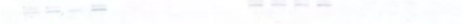

Supplement: fig1-figsupp1-data2 [file elife-67604-fig1-figsupp1-data2-v1.zip]
