# Supplementary material for: Pharmacological rescue of impaired mitophagy in Parkinson’s disease-related LRRK2 G2019S knock-in mice
Source: eLife. 2021 Aug 3;10:e67604. doi: 10.7554/eLife.67604 (PMC8331189; doi:10.7554/eLife.67604)
Supplement: Figure 1—figure supplement 1—source data 1. [file elife-67604-fig1-figsupp1-data1.xlsx]

## Sheet: B-Mitophagic cells %
WT-CTL	WT-DFP	WT-EBSS	KO-CTL	KO-DFP	KO-EBSS	G2019S-CTL	G2019S-DFP	G2019S-EBSS
18.1818	52	61.1111	55	90.4762	89.4737	12.069	51.6129	67.3469
35.2941	75	76.4706	47.6191	66.6667	57.1429	10	60	68.75
23.5294	64.7059	64.7059	40	76.5957	72.165	10.8108	80.4348	65.5462
22.2222	94.1176	64.2857	37.1429	90.2439	87.9518	13.1148	92.3077	76
26.3158	84.9057	63.6364	41.6667	87.931	74.1936	11	90	87.5
25	82.9787	76.4706	36.1111	97.9167	73.5849	15.7303	86.3636	65.7143
30.4348	92.8571	82.3529		89.7959	76.1905	12.963	86.8421	76.0417
26.3158	90.625	57.5
		52.9412

## Sheet: C-Autophagic cells %
WT CTL	WT DFP	WT EBSS	GS CTL	GS DFP	GS EBSS	KO CTL	KO DFP	KO EBSS
33.3333	33.3333	13.6364	23.5294		38.2353	18.75	10	58.8235
20	4.54545	91.6667	16.6667	36.8421	64	62.5	50	80
13.3333	33.3333	65.5172	11.7647	30.7692	63.6364	7.14286	50	71.4286
15.3846	53.8462	94.4444	16.6667	33.3333		15.7895		43.9024
						21.0526
						16.6667

## Sheet: D-WT-Mitophagic cells %
	GSK2578215A	GSK2578215A	GSK2578215A	Mli-2	Mli-2	Mli-2
0	250	500	1000	5	10	20
20.5882	35.7143	37.5	41.6667	38.0952	40	20
22.5806	42.8571	39.1304	36.3636	34.7826	40	22.2222
20	33.3333	53.8462	52.9412	30	55	27.7778
19.0476	54.5455			40
18.1818	45.4545			42.8571
35.2941	53.1915			40
23.5294
22.2222
26.3158
25
30.4348
26.3158
28.125
20.8333
28.8462
25
27.7778
25
24.1379
22.8571
28.5714
27.2727

## Sheet: D-LRRK2KO-Mitophagic cells %
	GSK2578215A	GSK2578215A	GSK2578215A	Mli-2	Mli-2	Mli-2
0	250	500	1000	5	10	20
34.6154	38.8889	40.9091	37.2093	40	33.3333	17.8571
38.8889	38.6364	41.6667	43.9024	38.2353	47.8261	28.2051
47.3684	50	48	45.4545	50	46.1538	26.9231
35	48.2759			46.1538
55	44.8276			37.931
47.6191
40
37.1429
41.6667
36.1111
42.8571
45
43.4783
45
46.6667
41.1765
42.3077
47.3684

## Sheet: D-G2019S-Mitophagic cells %
	GSK2578215A	GSK2578215A	GSK2578215A	Mli-2	Mli-2	Mli-2
0	250	500	1000	5	10	20
10.5263	33.3333	30.303	40.9091	18.9189	33.3333	21.7391
10.4167	17.9487	26.4706	36.3636	19.4444	30	17.8571
14.1481	25	28.5714	50	20	30	26.3158
9.78571	24.0741			20.3704
12.069	26.4151			22.449
10
10.8108
13.1148
11
15.7303
12.963
13.3333
17.3913
16.6667
15
14.2857
13.3333
15.7895
14.2857
14.2857
