# Supplementary material for: Pharmacological rescue of impaired mitophagy in Parkinson’s disease-related LRRK2 G2019S knock-in mice
Source: eLife. 2021 Aug 3;10:e67604. doi: 10.7554/eLife.67604 (PMC8331189; doi:10.7554/eLife.67604)
Supplement: Figure 1—source data 1. [file elife-67604-fig1-data1.xlsx]

## Sheet: C - Mitophagic cells
WT-CTL	G2019S-CTL	KO-CTL
18.1818	12.069	55
35.2941	10	47.6191
23.5294	10.8108	40
22.2222	13.1148	37.1429
26.3158	11	41.6667
25	15.7303	36.1111
30.4348	12.963
26.3158

## Sheet: F - Autolysosomes per cell
WT	G2019S	LRRK2 KO
295.8	174.353	224.188
132.333	187.714	545.292
129.2	232.867	62.7143
192.538	238.636	195.526
		208.278
		215.5

## Sheet: H - Mitophagic cells
WT	WT	WT	WT	WT	WT		G2019S	G2019S	G2019S	G2019S	G2019S	G2019S		LRRK2 KO	LRRK2 KO	LRRK2 KO	LRRK2 KO	LRRK2 KO	LRRK2 KO
0	0.1	1	10	100	1000		0	0.1	1	10	100	1000		0	0.1	1	10	100	1000
28.125			52.1739	44	45.1613		13.3333			34	45.4545	43.5897		42.8571			43.4783	43.3333	45.4545
20.8333			42.5	41.6667	45.7143		17.3913			30.303	42.8571	43.75		45			48.4849	45.7143	50
28.8462			41.4634	43.5484	44.4444		16.6667			33.3333	46.8085	50		43.4783			44.4444	48.1482	44.4444
25	27.2727	36.3636					13.3333	18.75	30					41.1765	42.8571	47.3684
27.7778	26.3158	34.375					15.7895	16.6667	14.2857					42.3077	47.3684	40
25	22.2222	33.3333					14.2857	14.2857	22.2222					47.3684	47.0588	44.4444
							14.2857		23.0769
