# Supplementary material for: Pharmacological rescue of impaired mitophagy in Parkinson’s disease-related LRRK2 G2019S knock-in mice
Source: eLife. 2021 Aug 3;10:e67604. doi: 10.7554/eLife.67604 (PMC8331189; doi:10.7554/eLife.67604)
Supplement: Figure 2—figure supplement 1—source data 1. [file elife-67604-fig2-figsupp1-data1.xlsx]

## Sheet: A-pS935 LRRK2 on total LRRK2
Replicate	DMSO	0.1 nM GSK-X	1 nM GSK-X	10 nM GSK-X	100 nM GSK-X	1000 nM GSK-X
1	0.883378	1.13077	1.02645	0.551076	0.30488	0.248942
2	0.840342	1.14473	1.01626	0.274716	0.185597	0.163045
3	1.07924	0.95016	0.740155	0.374657	0.183525	0.140519

## Sheet: C-Mitophagic cells %
Replicate	DMSO control	10 nM GSK-X
1	18.75	31.0345
2	27.5862	39.2857
3	21.3115	34.375

## Sheet: E-Mitophagic cells %
Replicate	WT DMSO	WT GSK-X	WT CCCP	WT CCCP + GSK-X
1	9.78261	5.42636	93.1818	97.0297
2	6.66667	5	86.7403	78.1457
3	3.00752	1.42857	95.8763	100

## Sheet: H- O2 consumption
	CTL				GSK3357679A
GML(n)	20.8412	24.8646	17.8903	17.2042	26.2571	20.5411	17.0058	16.3014
GMP	85.8373	105.231	108.912	102.903	84.0581	105.949	108.904	103.332
GMSP	104.559	121.215	129.102	127.526	105.205	119.283	130.452	126.229
0.1	103.323	111.447	127.307	124.086	102.561	115.319	128.125	124.191
1	99.7903	101.679	124.166	122.688	100.27	109.733	126.962	121.724
10	96.0813	93.2424	121.811	122.15	98.1559	104.868	124.857	120.116
100	93.6086	101.856	117.661	119.408	96.2174	95.8585	122.198	118.078
1000	88.8399	62.1616*	114.128	117.526	91.6356	87.9304	118.985	115.611

## Sheet: I-O2 consumption
	CTL				X10														CTL										X
ROX	49.0609	36.8738	52.1439	21.3258	65.7344	28.9255	26.0572	35.9024
OctMP	59.8777	64.224	91.1481	63.6975	75.9831	70.6154	52.8419	53.6606
OctMcP	57.2183	61.5093	87.1513	60.7998	70.8751	60.7875	47.8746	52.1164
OctMP	90.9943	105.841	124.117	108.722	114.659	111.609	93.5037	77.0164
OctPMP	98.6935	115.746	130.669	116.002	129.111	122.816	100.646	95.7397
OctPGMP	106.277	120.427	132.865	125.781	139.516	130.56	108.143	100.758
OctPGMSP	138.302	134.612	152.503	136.846	163.872	157.895	123.041	107.321
OctPGMSGpP	147.289	137.406	160.169	136.329	172.266	164.895	126.822	90.7211
OctPGMSGpE	186.897	174.742	245.604	219.1	237.886	216.231	188.409	181.635
SGpE	111.358	107.436	154.181	125.711	133.604	110.967	104.032	131.256
