# Supplementary material for: Pharmacological rescue of impaired mitophagy in Parkinson’s disease-related LRRK2 G2019S knock-in mice
Source: eLife. 2021 Aug 3;10:e67604. doi: 10.7554/eLife.67604 (PMC8331189; doi:10.7554/eLife.67604)
Supplement: Figure 2—source data 1. [file elife-67604-fig2-data1.xlsx]

## Sheet: B - AutophagosomeColocalisation
CTL	GSK3357679A 10nM
28.6093	33.9679
27.9674	39.2196
26.0567	31.4262

## Sheet: C - AutolysosomeColocalisation
CTL	GSK3357679A 10nM
18.0937	23.9278
19.4589	32.2336
17.7626	29.2439

## Sheet: D - Mitophagic cells
WT	ATG5 KO	WT+GSK3357679A	ATG5 KO+GSK3357679A
12.1212	6.55738	31.25	13.04
7.59494	10.6061	18.1818	3.44828
9.83607	3.1746	23.1579	13.3333

## Sheet: F - % AL containing mitochondri
CTL	GSK3357679A
17.3913	24.7788
11.33	14.3345
16.9935	21.9008

## Sheet: F - Relative increase in mitoly
CTL	GSK3357679A
1	1.42478
1	1.26517
1	1.28878

## Sheet: H - Mitophagic cells
WT	WT	PINK1 KO	PINK1 KO
CTL	GSK3357679A 10nM	CTL	GSK3357679A 10nM
26.6667	42.1053	18.1818	53.8462
25	47.0588	25	33.3333
27.2727	50	23.0769	35.7143
		21.4286	43.75
