# Supplementary material for: Pharmacological rescue of impaired mitophagy in Parkinson’s disease-related LRRK2 G2019S knock-in mice
Source: eLife. 2021 Aug 3;10:e67604. doi: 10.7554/eLife.67604 (PMC8331189; doi:10.7554/eLife.67604)
Supplement: Figure 3—figure supplement 1—source data 1. [file elife-67604-fig3-figsupp1-data1.xlsx]

## Sheet: B-Autolysosomes per um2 TH
WT	G2019S	LRRK2 KO
0.369443	0.215082	0.322786
0.45936	0.185352	0.251748
0.174994	0.207565	0.274708
0.067365	0.333112	0.186459
0.240456	0.357375	0.114067
0.229823	0.096623	0.07751
0.0491	0.297552	0.202273
0.210963	0.369118	0.24579
0.239402		0.291457
0.545334
0.358859

## Sheet: B-Autophagosomes per um2 TH
WT	G2019S	LRRK2 KO
0.191036	0.39043	0.368556
0.149443	0.404205	0.207865
0.440701	0.266795	0.225962
0.220597	0.130749	0.429016
0.486157	0.162813	0.537283
0.367357	0.274178	0.432707
0.380049	0.315357	0.236373
0.182666	0.310873	0.22191
0.398271		0.125863
0.123734
0.42491

## Sheet: D-Autolysosomes per um2 Iba1
WT	G2019S	LRRK2 KO
7.15	5.68	15.045
8.225	5.825	9.95
10.95	8.25	18.75
12.125	17.4286	15.25
27.8	8.295	2.25
24	14.885	12.35
13.6	9.895	21.1
30.4167	5.455	17.85
1.6		4.75
1.35

## Sheet: D-Autophagosomes per um2 Iba1
WT	G2019S	LRRK2 KO
11.65	3.185	5.94
6.45	4.895	18.45
10	8.3	5.2
23.1	17.3929	1.95
13.75	3.5	16.695
5.6	8.625	6.15
23.35	21.78	8.15
25	8.875	16.6
11.25		19.275
13.4
