# Supplementary material for: Pharmacological rescue of impaired mitophagy in Parkinson’s disease-related LRRK2 G2019S knock-in mice
Source: eLife. 2021 Aug 3;10:e67604. doi: 10.7554/eLife.67604 (PMC8331189; doi:10.7554/eLife.67604)
Supplement: Figure 3—source data 1. [file elife-67604-fig3-data1.xlsx]

## Sheet: B - TH+ bodies per field
WT	G2019S	LRRK2KO
13.6	11.7	15.2
15.2	15.4	16.9
10.2	17	16.9
16.6	12.3	20.2
14.7754	10.9	12.2
15.7778	18.2	17.3
16	16.4	15.9
16.4	17.8	16.4
8.8	17.4	13.3
18.3
15.5

## Sheet: C - Mitolysosomes per um2 TH
WT	G2019S	LRRK2KO
0.112528	0.0710481	0.122018
0.100557	0.0824086	0.105701
0.080709	0.0842339	0.101728
0.0746833	0.0838498	0.102975
0.0872918	0.0817933	0.0991593
0.0873311	0.0833113	0.11685
0.0725929	0.0867561	0.0927377
0.0951895	0.0688108	0.0988305
0.0893825	0.0900976	0.10276

## Sheet: E - Mitolysosomes per um2 Calbi
	WT	GS	KO
	0.0110179	0.00676877	0.00588839
	0.00610272	0.0117312	0.0105393
	0.0144394	0.010335	0.0092832
	0.0169232	0.00412748	0.0114742
	0.00972709	0.0049828	0.00593415
	0.00653417	0.00760929	0.0171137
	0.0140165	0.00867667	0.00884562
	0.00901607	0.0161281	0.00659886
	0.00215109	0.0134388	0.00630489
	0.0153408

## Sheet: G - Iba1+ cell bodies per field
WT	G2019S	LRRK2 KO
2.2	3.2	2.6
2.2	3.1	2.3
2.1	3.2	2.1
2.1	2.5	2.4
2.16667	2.83333	2.16667
2.3	3.2	2.1
2.2	3.1	2.2
2	3.2	2.3
2.2	3.2	2.3
2.3	2.9

## Sheet: H - Mitolysosomes per IBA1+ cel
WT	GS	KO
4.88333	2.85	8.41667
4.88333	2.11667	6.25
3.95	3.93333	5.33333
6.5	2.61667	6.78333
4.43333	4.10833	5.16667
5.20667	3.44167	5.85833
6.91667	2.40833	9.76667
9.11667	2.78833	10.8
6.8	4.72222

## Sheet: J - Mitolysosomes per um2 GFAP
WT	KO	GS
0.0742817	0.130418	0.053972
0.077632	0.0467382	0.0525595
0.0586519	0.0547625	0.0279849
0.113146	0.0171852	0.0518343
0.0460683	0.0623168	0.0313024
0.0598202	0.0468952	0.0297392
0.0241271	0.041127	0.0925757
0.030232	0.1527	0.0723925
0.0245489		0.0785764
0.0380767
