# Supplementary material for: Pharmacological rescue of impaired mitophagy in Parkinson’s disease-related LRRK2 G2019S knock-in mice
Source: eLife. 2021 Aug 3;10:e67604. doi: 10.7554/eLife.67604 (PMC8331189; doi:10.7554/eLife.67604)
Supplement: Figure 4—figure supplement 1—source data 1. [file elife-67604-fig4-figsupp1-data1.xlsx]

## Sheet: A-Lung mitochondrial content
WT	G2019S	LRRK2 KO
1269040	1326289	809187
1199637	1483135	780959
712822	1183405	745647
719107	995523	810340
1733707	1655995	1119296
847666	1304711	808955
910806	1110310	939354
993321	1436959	690307
695665	831480	850628

## Sheet: C-Lung autophagosomes
WT	G2019S	LRRK2 KO
0.00740645	0.002431	0.00214642
0.0116944	0.00716919	0.00108613
0.00852986	0.00111136	0.00875658
0.0104253	0.000677332	0.00215738
0.00956833	0.00825792	0.00596753
0.00793418	0.0107337	0.00455531
0.00922984	0.00935029	0.00457332
0.00946988	0.00391369	0.00744809
0.00652078	0.00938021	0.00397581
0.00753751		0.00880475
0.00805832
0.00315305
0.00510798
0.00517098
0.00821335

## Sheet: D-Kidney autophagosomes
WT	G2019S	LRRK2 KO
0.0033516	0.00199438	0.0037054
0.00461417	0.00164367	0.00318373
0.00341189	0.00370141	0.0060342
0.00197323	0.00277596	0.00433643
0.00313925	0.00193788	0.00230223
0.00240987	0.00105716	0.00597339
0.00216735	0	0.00410667
0.00206204	0.00276691	0.00460202
0.00264107	0.00226949	0.0123128
0.00313083		0.00150857
0.00268977
0.000547134
0.00182246
0.000792683
0.00480898
0.00780334
