# Supplementary material for: Pharmacological rescue of impaired mitophagy in Parkinson’s disease-related LRRK2 G2019S knock-in mice
Source: eLife. 2021 Aug 3;10:e67604. doi: 10.7554/eLife.67604 (PMC8331189; doi:10.7554/eLife.67604)
Supplement: Figure 4—source data 1. [file elife-67604-fig4-data1.xlsx]

## Sheet: B - Lungs mito-QC
WT	G2019S	LRRK2 KO
0.00260437	0.000283455	0.00507839
0.00139013	0.000448383	0.00413439
0.00326651	0.00117424	0.00750669
0.00113426	0.00148314	0.00486284
0.00110304	0.00216742	0.00398396
0.00281204	0.00424096	0.00585086
0.00115554	0.000454654	0.00376593
0.00333583	0.000547188	0.00595633
0.00420817	0.00052375	0.00599878

## Sheet: D - Kidney mito-QC
WT	G2019S	LRRK2 KO
0.03732	0.026113	0.027218
0.034701	0.023887	0.031372
0.029052	0.032128	0.034972
0.032865	0.030171	0.026909
0.031405	0.022429	0.028771
0.034908	0.0253	0.023608
0.027973	0.022286	0.03079
0.026985	0.024109	0.033563
0.034894	0.033937
0.028062
0.036616
0.033485

## Sheet: F - Lungs auto-QC
WT	G2019S	LRRK2 KO
0.0620185	0.0507288	0.0658286
0.0591692	0.0571977	0.0477174
0.0307843	0.0466529	0.0374243
0.0478731	0.05009	0.057339
0.0724451	0.0614111	0.0301232
0.0488596	0.06072	0.0492834
0.0368739	0.0453774	0.0330405
0.0612312	0.0480378	0.0555619
0.0366583	0.0394217	0.0304743
0.0339065		0.0520986
0.0521592
0.058041
0.0227579
0.0639054
0.0742401

## Sheet: H - Kidney auto-QC
WT	G2019S	LRRK2 KO
0.0440528	0.0394562	0.0480721
0.0402848	0.0491373	0.0463244
0.0404499	0.04547	0.039351
0.0413289	0.0404388	0.0331767
0.0423248	0.0405007	0.0335041
0.0390764	0.0133773	0.0339773
0.0457275	0.022296	0.0298986
0.0353411	0.0303261	0.0267746
0.0423051	0.0279674	0.034947
0.0463215		0.0324104
0.0244999
0.0316521
0.0316235
0.0394004
0.0220205
0.0400885
