# Supplementary material for: Pharmacological rescue of impaired mitophagy in Parkinson’s disease-related LRRK2 G2019S knock-in mice
Source: eLife. 2021 Aug 3;10:e67604. doi: 10.7554/eLife.67604 (PMC8331189; doi:10.7554/eLife.67604)
Supplement: Figure 5—figure supplement 1—source data 1. [file elife-67604-fig5-figsupp1-data1.xlsx]

## Sheet: A-Weights
Time	WT-V													WT-GSK3357679A													GS-V													GS-GSK3357679A
0	26	27.5	22.9	21.7	29.1	24.6	20.5	21.5	25.9	27.8				18.8	26.3	25.5	20.8	24.9	19.2	24.1	29	28	20.7				20	24.9	25.3	20.5	19	20.1	28.3	18.3	21	21.1				26.2	17.6	20.4	17.6	26.7	22.9	21.5	24.5	27.2	28.4
1
2
3
4
5
6
7
8
9
10
11
12	26.2	27.8	23.1	22.5	29.3	25	21.5	22	26.3	28.6				19.3	26.8	26	20.7	24.5	18.7	24.1	29.1	28.2	21				20.4	25.2	25.6	21.1	19.7	21.1	27.8	18.9	21.4	21.6				26.8	18.3	20.6	18.2	27.2	22.5	21.6	25.5	26.8	28.5
13
14
15
16
17
18
19
20
21
22
23
24	25.1	26.5	23	21.8	29.1	24.2	20.7	21.1	25.2	27.1				18.5	26	24.9	20.5	23.9	18.4	23.5	27.9	26.9	20.2				19.8	24.5	24.6	20	18.7	20	27.2	18.1	20.9	21.2				25.2	17.2	20.1	17.6	26.8	22	20.4	24.2	26.1	28
25
26
27
28
29
30
31
32
33
34
35
36	24.1	27.1	23	22.5	28.8	24.8	21	21.3	26.2	27.4				19.2	26.3	25.5	21.2	24.4	18.5	23.6	28	25.5	21.2				20.2	25	25.4	19.9	19.4	20.7	27.4	19.3	21.2	21.3				24.9	18.2	20.6	18	27.5	22.6	21.3	24.9	26.9	28.2
37
38	23.3	26.3	22.4	22.1	28.1	24.4	20.7	21.2	25.1	26.9				19.3	25.9	25.4	20.7	24.1	18.8	23.7	27.5	25.4	20.9				20.1	24.6	24.8	20	19	20.5	27.1	19	21	20.6				24.9	18.21	20.5	18	27.6	21.9	20.9	24.4	26.7	28.2

## Sheet: C-P on T LRRK2 Lung
WT-V	WT-GSK3357679A	G2019S-V	G2019S-GSK3357679A
0.481565	0.0153655	0.743035	0.0909641
0.616033	0.029776	0.749443	0.0924054
1.16543	0.0379288	0.777488	0.260362
1.52956	0.0414223	1.06589	0.0854232
1.03888	0.0418795	0.876208	0.182874

## Sheet: C-P on T LRRK2 Kidney
WT-V	WT-GSK3357679A	G2019S-V	G2019S-GSK3357679A
1.12704	0.048075	0.5561	0.07224
0.963191	0.02949	0.86971	0.019516
0.840084	0.027734	0.440736	0.019528
1.0873	0.042649	0.520185	0.034028
0.982389	0.083737	0.525531	0.104892

## Sheet: C-P on T Rab10 Lung
WT-V	WT-GSK3357679A	G2019S-V	G2019S-GSK3357679A
0.823117	0.0200144	0.629525	0.00290924
0.72105	0.0136829	2.54858	0.0010916
2.30573	0.0193229	0.866818	0.00829219
1.60466	0.00579093	0.547577	0.00733863
0.52524	0.00950751	0.921588	0.0285492

## Sheet: C-P on T Rab10 Kidney
WT-V	WT-GSK3357679A	G2019S-V	G2019S-GSK3357679A
0.536751	0.133375	2.05149	0.070904
0.725955	0.397304	2.49389	0.33191
0.704181	0.395275	1.96368	0.697843
1.68696	0.445929	1.86119	0.449519
1.34615	0.602898	1.63717	0.702526
