# Supplementary material for: Pharmacological rescue of impaired mitophagy in Parkinson’s disease-related LRRK2 G2019S knock-in mice
Source: eLife. 2021 Aug 3;10:e67604. doi: 10.7554/eLife.67604 (PMC8331189; doi:10.7554/eLife.67604)
Supplement: Figure 5—source data 1. [file elife-67604-fig5-data1.xlsx]

## Sheet: B - pLRRK2 on total
WT-V	WT-GSK	GS-V	GS-GSK	KO-V	KO-GSK
0.670634	0.566737	0.578461	0.211867	0	0
0.806003	0.317126	0.682643	0.139022	0	0
0.740243	0.263681	0.659172	0.190196
1.57314	0.304377	0.639488	0.27283
1.20998	0.372114	0.654431	0.264318

## Sheet: B - pRab12 on total
WT-V	WT-X	GS-V	GS-X	KO-V	KO-X
0.880886	0.470055	1.60518	0.351074	0.37453	0.169169
0.821437	0.317309	1.23198	0.4552	0.226143	0.199032
0.853267	0.447806	1.51671	0.393112
0.770994	0.679781	1.66332	0.23768
0.940285	0.499045	1.75183	0.451359

## Sheet: C - PGC-1a
WT-V	WT-GSK	GS-V	GS-GSK	KO-V	KO-GSK
0.917272	0.715795	1.24644	1.5337	0.972526	0.741916
0.936508	0.966639	1.26135	1.34147	0.85279	0.895675
0.923165	0.965526	1.14139	1.35225
1.09105	1.01273	1.15531	1.23273
1.13201	1.16382	1.38175	1.17726

## Sheet: C - PGC-1b
WT-V	WT-GSK	GS-V	GS-GSK	KO-V	KO-GSK
0.774427	1.50295	1.58891	1.4775	1.927	1.73164
0.782616	1.93511	1.10894	1.85027	2.1191	1.43406
0.974918	1.63821	1.33746	2.12376
1.03127	1.70396	1.41814	2.12754
1.43677	1.60599	1.54555	2.13435

## Sheet: C - TFAm
WT-V	WT-X	GS-V	GS-X	KO-V	KO-X
0.632822	1.45534	0.690001	1.64792	1.34497	1.55857
0.656842	1.58792	0.536535	1.67445	1.07873	1.18191
1.28538	1.23481	0.76264	1.15875
1.14564	0.996657	1.43365	1.45394
1.27932	0.903383	1.18098	1.80096

## Sheet: C - TOMM20
WT-V	WT-X	GS-V	GS-X	KO-V	KO-X
1.02103	1.10024	1.11045	1.21455	0.711878	0.583708
0.940167	1.14737	0.998168	1.17366	0.681075	0.516453
1.00353	1.09921	1.14576	1.11871
0.981128	1.09704	1.17751	0.952404
1.05415	1.08175	1.19925	0.838302

## Sheet: D - LC3 II on I
WT-V	WT-X	GS-V	GS-X	KO-V	KO-X
0.232235	0.209312	0.288281	0.227651	0.274516	0.249043
0.205614	0.244405	0.203222	0.201793	0.226401	0.217358
0.242324	0.26916	0.24209	0.256496
0.276719	0.321166	0.207641	0.245926
0.267211	0.253011	0.214189	0.283469

## Sheet: D - p62
WT-V	WT-X	GS-V	GS-X	KO-V	KO-X
0.854563	1.25493	1.05834	0.91973	1.15043	1.2637
0.991568	1.13753	0.819965	1.00369	1.16467	1.32439
1.02696	0.991558	1.16568	1.12806
0.904519	1.15433	1.05397	1.14571
1.22239	0.939723	1.21236	1.22054
