# Supplementary material for: Pharmacological rescue of impaired mitophagy in Parkinson’s disease-related LRRK2 G2019S knock-in mice
Source: eLife. 2021 Aug 3;10:e67604. doi: 10.7554/eLife.67604 (PMC8331189; doi:10.7554/eLife.67604)
Supplement: Figure 6—figure supplement 1—source data 1. [file elife-67604-fig6-figsupp1-data1.xlsx]

## Sheet: A - IBA1+ cells per field
WT-V	WT-X	GS-V	GS-X
2.2	2.2	3.5	2.5
2.2	2.1	3.4	2.3
2.5	2.2	2.8	1.8
2.3	2.3	3.5	2.7
2.4	2	3.2	2.7
2.4	2.5	3	2.9
2.4	2.2	3.5	2.8
1.9	1.8	3.1	2.8
2	2.2	2.9	2.9
2.3	2.1	3.1	2.8

## Sheet: C-Mitolysosomes per um2 kidney
WT-V	WT-X	G2019S-V	G2019S-X
0.028402	0.031237	0.029814	0.019926
0.034069	0.026413	0.025512	0.023321
0.03646	0.030448	0.024134	0.021671
0.029593	0.029653	0.025946	0.022822
0.027427	0.030054	0.02608	0.020794
0.030488	0.03028	0.029544	0.021734
0.035032	0.027534	0.013121	0.026437
0.033919	0.031212	0.019519	0.027018
0.033591	0.03514	0.019355	0.025127
0.024814	0.030194	0.023425	0.021926
