# Supplementary material for: Pharmacological rescue of impaired mitophagy in Parkinson’s disease-related LRRK2 G2019S knock-in mice
Source: eLife. 2021 Aug 3;10:e67604. doi: 10.7554/eLife.67604 (PMC8331189; doi:10.7554/eLife.67604)
Supplement: Figure 6—source data 1. [file elife-67604-fig6-data1.xlsx]

## Sheet: B - Mitolysosomes TH+
WT-V	WT-GSK	GS-V	GS-GSK	KO-V	KO-GSK
0.11042	0.184561	0.085435	0.110325	0.159882	0.124956
0.147985	0.175272	0.104509	0.084755	0.180231	0.189761
0.0964	0.140293	0.116	0.104043	0.200005	0.123918
0.124955	0.17556	0.116553	0.121456	0.131843	0.131968
0.186404	0.13395	0.045891	0.141177	0.114694	0.110372
0.083219	0.141193	0.104511	0.095678
0.10392	0.167432	0.075445	0.08231
0.140204	0.162843	0.113668	0.107457
0.11	0.112057	0.061331	0.140703
0.107	0.147		0.083039

## Sheet: D - Mitolysosomes IBA1+
WT-V	WT-X	GS-V	GS-X	KO-V	KO-X
7.4375	8.66667	2.18333	6.85833	12.4167	5.69167
6.8	10.175	4.99833	7.8	9.15	10.45
7.16667	11.5	3.38333	7.6	9.18333	10.4
8.31667	8.98333	2.55	5.15333	4.59259	11.5
6.75833	10.9167	3.47667	5.85	10.4	9.68333
5.56	7.8	5.62857	5.64833
7.24167	8.25	2.35952	7.91833
6.67593	7.55	4.025	4.68333
4.3	8.75	1.41667	6.15833
4.19167	7.09167	2.41667	5.875

## Sheet: F - Mitolysosomes Lungs
WT-V	WT-GSK	G2019S-V	G2019S-GSK	KO-V	KO-GSK
0.002327	0.006592	0.00134	0.003293	0.004912	0.005071
0.002351	0.007257	0.000678	0.00383	0.013601	0.005787
0.001812	0.004117	0.00081	0.002114	0.003211	0.011029
0.002101	0.00532	0.000689	0.001085	0.009949	0.005831
0.003308	0.004736	0.000678	0.003998	0.0052	0.005653
0.001692	0.004875	0.00182	0.004546
0.002008	0.006595	0.000574	0.003384
0.001764	0.003946	0.001374	0.001489
0.002912	0.00801	0.000838	0.001479
0.004435	0.006225	0.001231	0.001334
