# Supplementary figures and images for: Pharmacological rescue of impaired mitophagy in Parkinson’s disease-related LRRK2 G2019S knock-in mice
Source: eLife journal article supplement (doi:10.7554/elife.67604), 2021-08-02

LRRK2

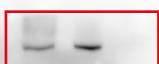

Tubulin

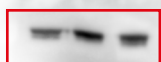

Supplement: fig1-data2 [file Figure 1-source data 2 - C.pdf › Figure 1-source data 2 - C/Figure 1-source data 2 - C.pdf]

LRRK2

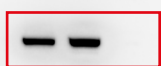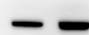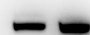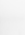

Tubulin

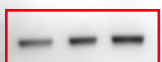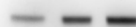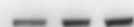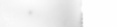

Supplement: fig1-data3 [file elife-67604-fig1-data3-v1.zip]

pS935 LRRK2

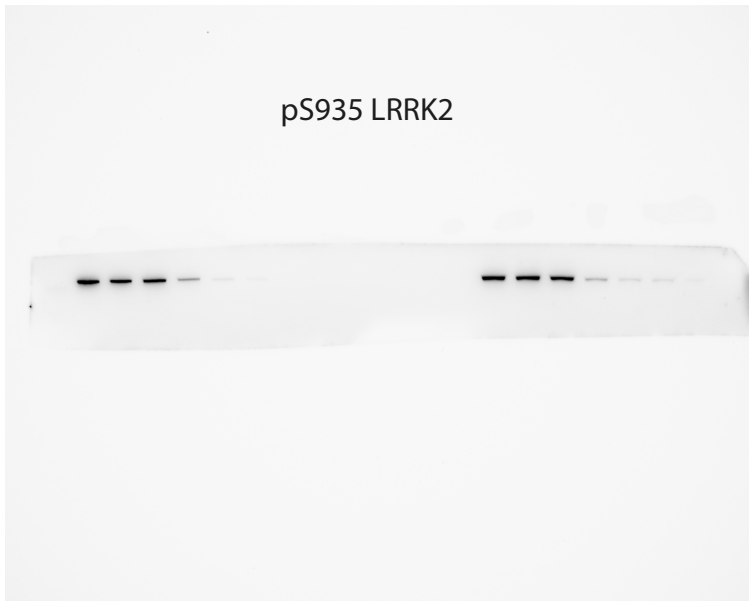

LRRK2

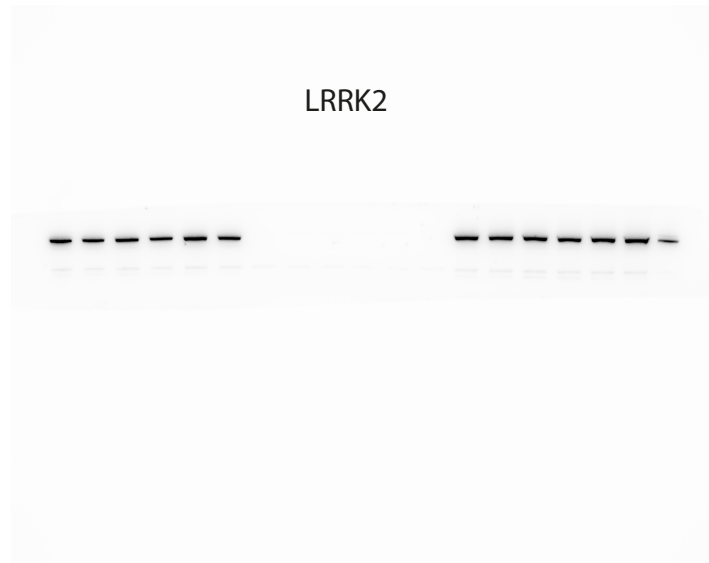

pT73 Rab10

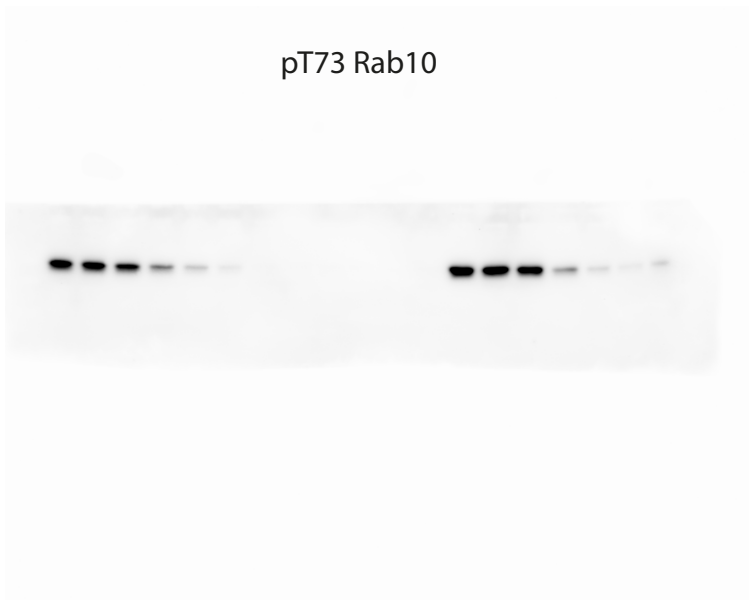

Rab10

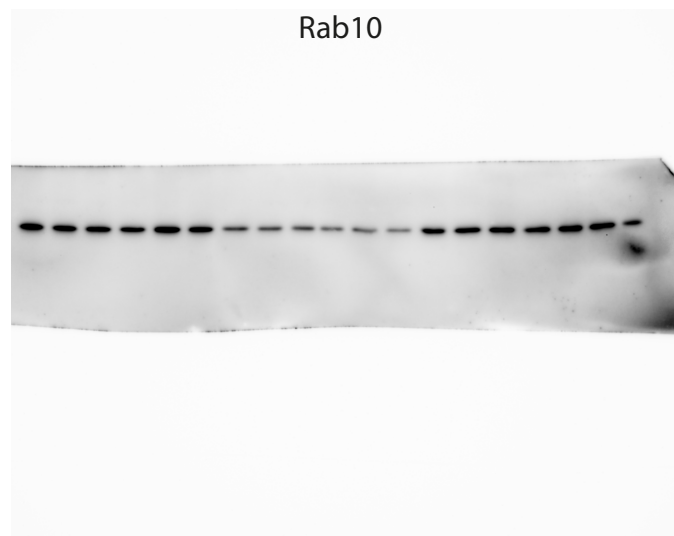

Tubulin

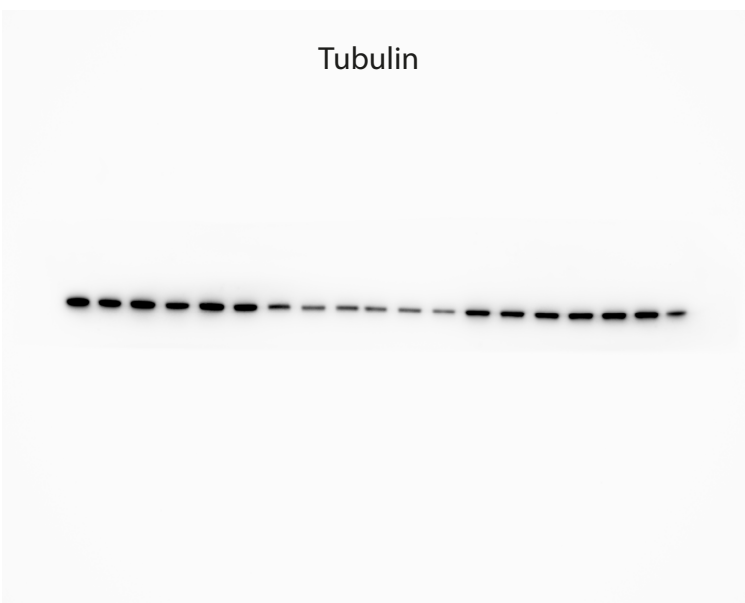

Supplement: fig1-data4 [file elife-67604-fig1-data4-v1.zip]

pS935 LRRK2

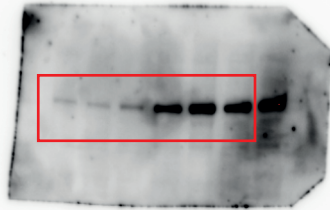

LRRK2

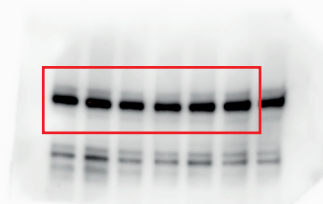

Supplement: fig2-figsupp1-data2 [file elife-67604-fig2-figsupp1-data2-v1.zip]

Parkin

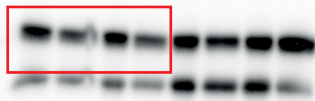

phospho-Ubiquitin

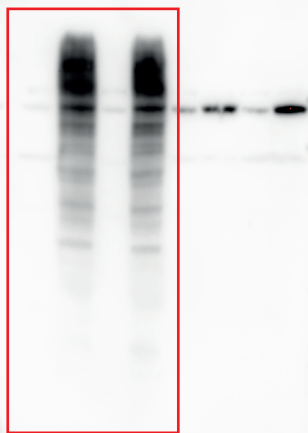

Supplement: fig2-figsupp1-data3 [file elife-67604-fig2-figsupp1-data3-v1.zip]

pS935 LRRK2

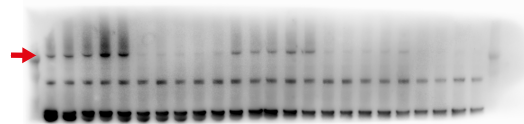

pS106 Rab 12

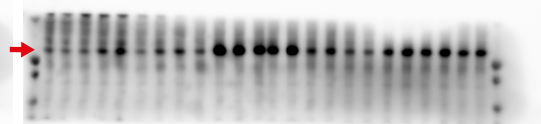

HSP60

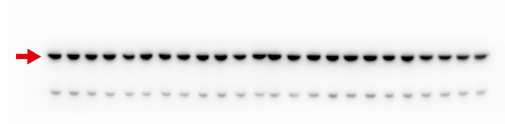

LRRK2

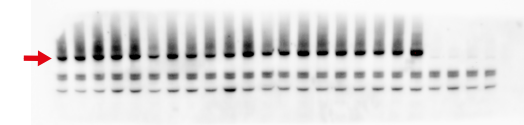

Rab12

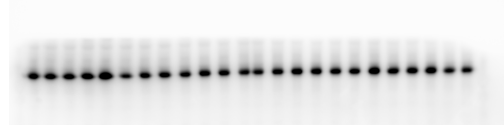

TOMM20

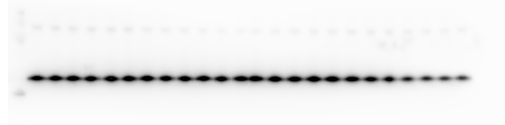

PGC-1a

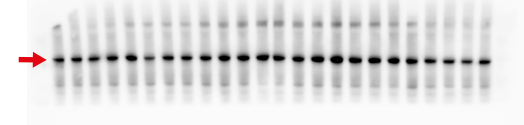

PGC-1B

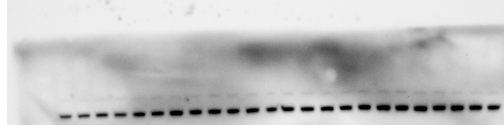

TFAm

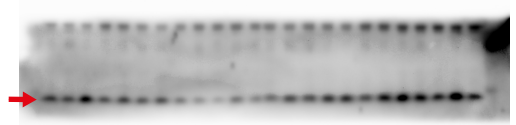

p62

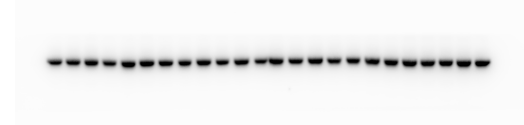

LC3

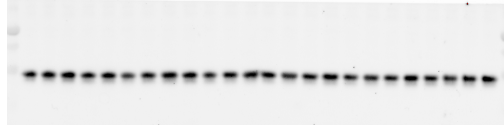

Actin

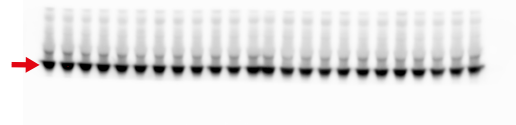

Supplement: fig5-data2 [file elife-67604-fig5-data2-v1.zip]

Lungs

pS935 LRRK2

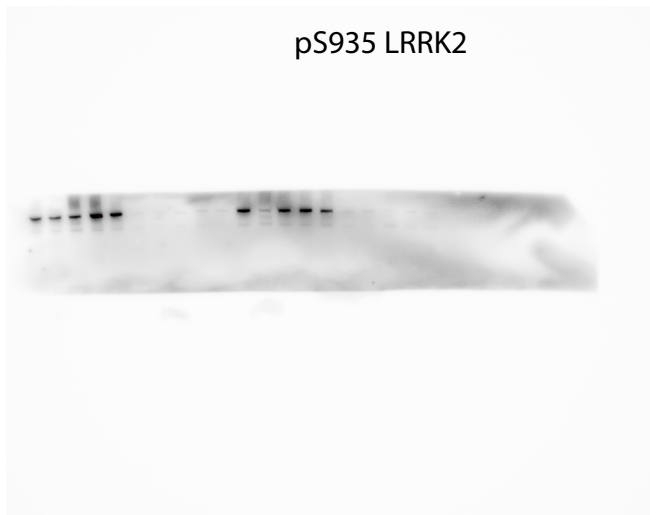

pT73 Rab10

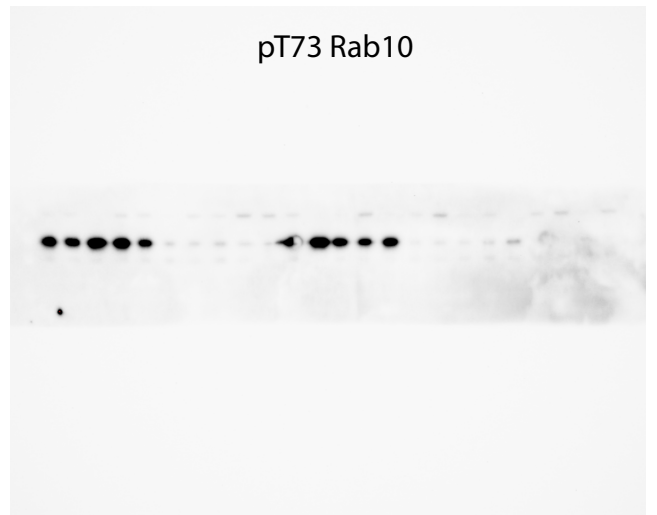

LRRK2

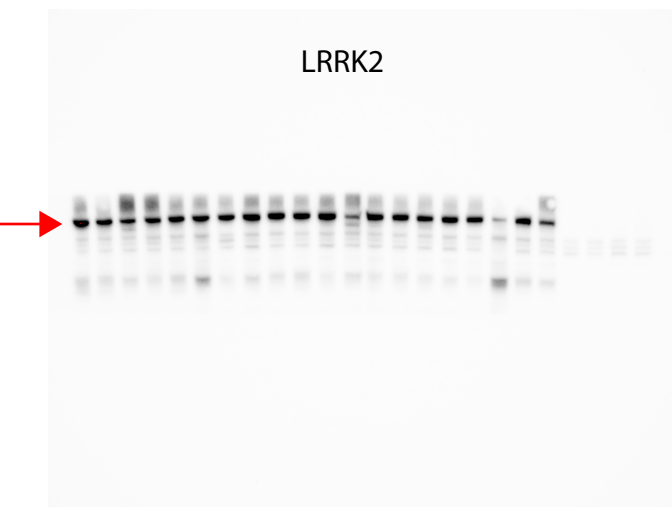

Rab10

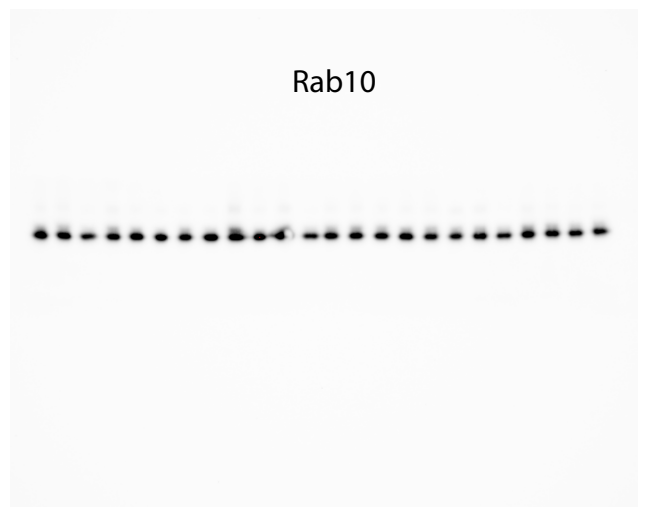

Actin

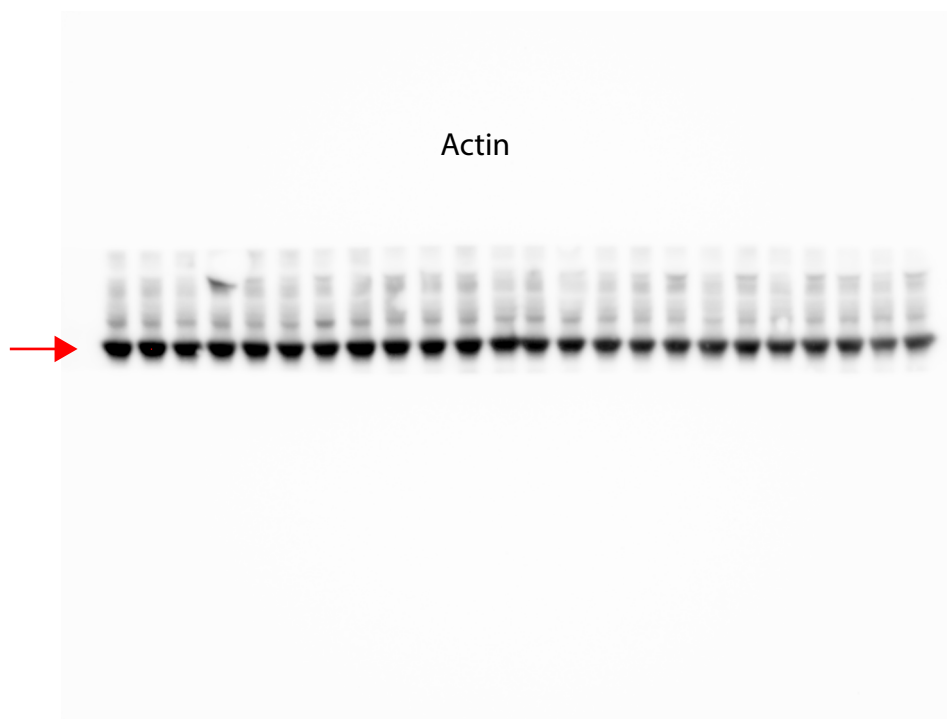

Supplement: fig5-figsupp1-data2 [file elife-67604-fig5-figsupp1-data2-v1.zip]

Kidney

pS935 LRRK2

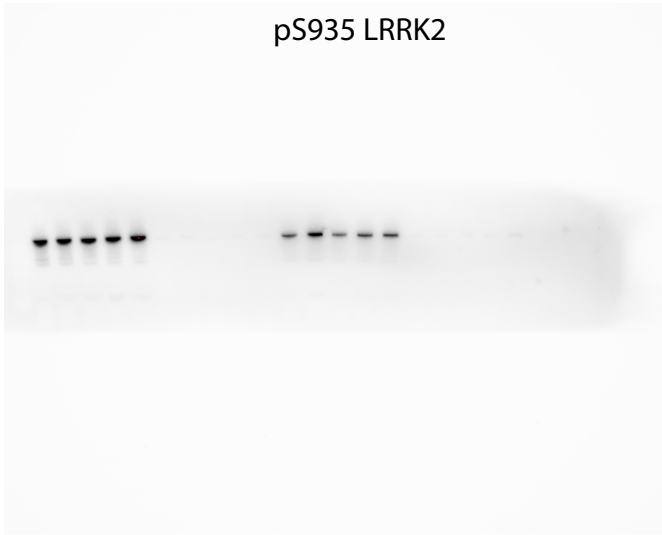

pT73 Rab10

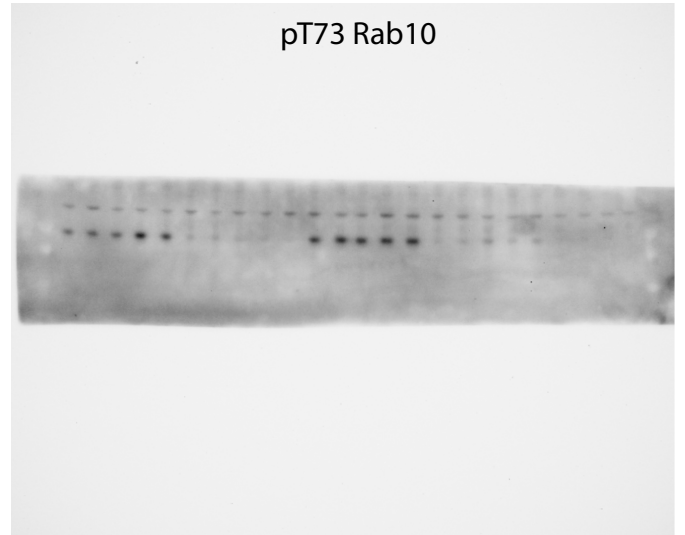

LRRK2

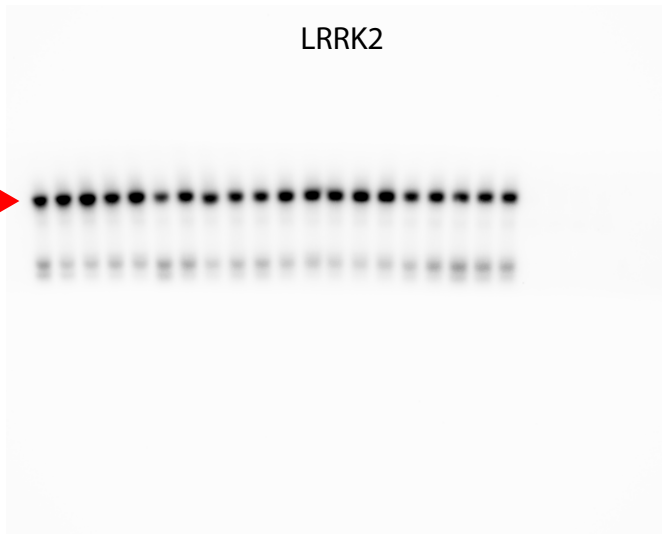

Rab10

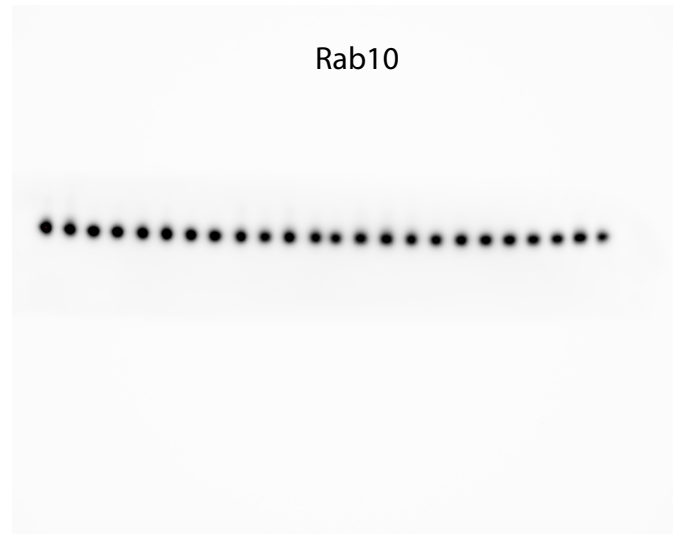

Actin

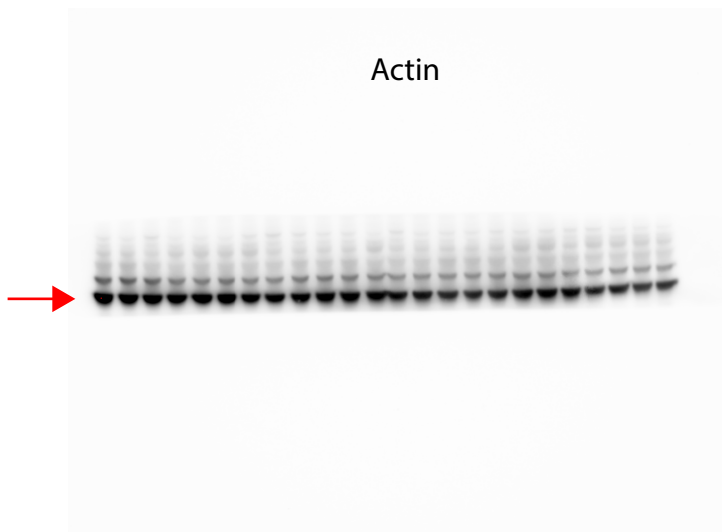

Supplement: fig5-figsupp1-data2 [file elife-67604-fig5-figsupp1-data2-v1.zip]
